# Supplementary material
Source: Springer Nature journal article supplement (https://www.springermedizin.de/resource/supplementary/12993_2008_213_MOESM17_ESM.pdf/9617306)

□ A1 Control (N=27) ■ A2 Control. (N=27) □ A1 ADHD (N=25) ■ A2 ADHD (N=24)

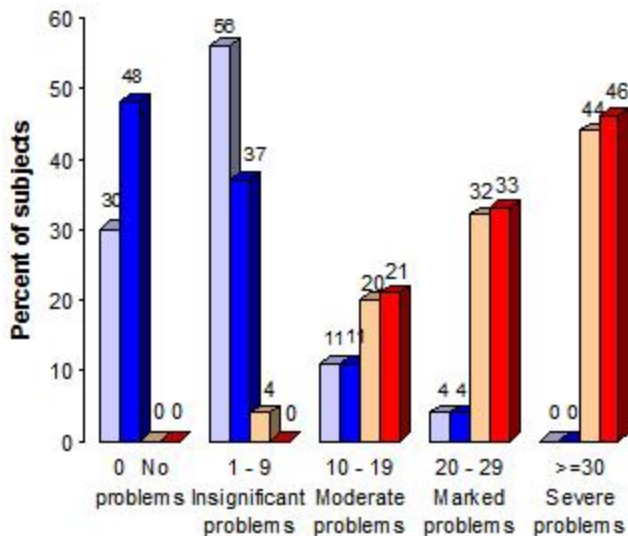

TS scores (0-34) organized into 5 categories

Supplement: MOESM17 [file 9617306]
